# Supplementary material
Source: publisher figshare collection journal article supplement (https://gsajournals.figshare.com/ndownloader/files/22811831)
Supplement: Supplementary file 1 [file 22811831]

## Sheet: Sheet1
Table S2	Additional Injections performed
Injection	Plasmid #	Integration plasmid	Concentration (ng/ul)	Plasmid #	Other DNAs	Concentration (ng/ul)	Strain injected	Insertion lines
171	NM3724	pLF3FShC tetO 7X GFP-C1	52				jsTi1492	js1540
173	NM3774	pLF3FShC tetO 7X ∆mec-7p GFP-C1	50				jsTi1453; bqSi711	jsSi1543
174	NM3775	pLF3FShC tetO 7X ∆myo-2p GFP-C1	50				jsTi1453; bqSi1711	jsSi1544
185	NM3814	pLF3FShC mec-4p rtetR-L-QF	30	NM141	pBluescript KS(+)	100	jsTi1493	jsSi1548
186	NM3813	pLF3FShC mec-4p lexA-L-QF	30	NM141	pBluescript KS(+)	100	jsTi1493	jsSi1549
188	NM3810	pLF3FShC mec-4p QF	40				jsTi1493	jsSi1551
189	NM3725	pLF3FShC UAS 11X GFP-C1	50				jsTi1492	jsSi1552
190	NM3810	pLF3FShC mec-4p QF	50				jsTi1490	jsSi1553
192	NM3811	pLF3FShC mec-4p QF2	46				jsTi1493	jsSi1554
195	NM3813	pLF3FShC mec-4p lexA-L-QF	45	NM141	pBluescript KS(+)	50	jsTi1490	jsSi1555
196	NM3823	pLF3FShC mec-4p tetR-L-QF	60				jsTi1493	jsSi1560
